# Supplementary material for: Suppressing Effect of Na+/Ca2+ Exchanger (NCX) Inhibitors on the Growth of Melanoma Cells
Source: MDPI journal article supplement (doi:10.3390/ijms23020901), 2022-01-14
Supplement: s1 [file s1]

# Supplementary materials

## Suppressing effect of Na<sup>+</sup>/Ca<sup>2+</sup> exchanger (NCX) inhibitors on the growth of melanoma cells

Zi-Kai Liu <sup>#</sup>, Qing Cheng <sup>#</sup>, Xiao-Li Ma and Mingke Song <sup>\*</sup>

Department of Pharmacology and Chemical Biology, Institute of Medical Sciences, Shanghai Jiao Tong University School of Medicine, 280 South Chongqing Road, Shanghai, 200025, China

<sup>\*</sup> Correspondence: Corresponding author: Mingke Song, PhD; Associate Professor; mksong@sjtu.edu.cn

<sup>#</sup> These authors contributed equally to this work.

This PDF document contains:

Supplementary Figure S1

Supplementary Figure S2

Supplementary Figure S3

### S1. Three-dimensional (3D) cell culture and treatment

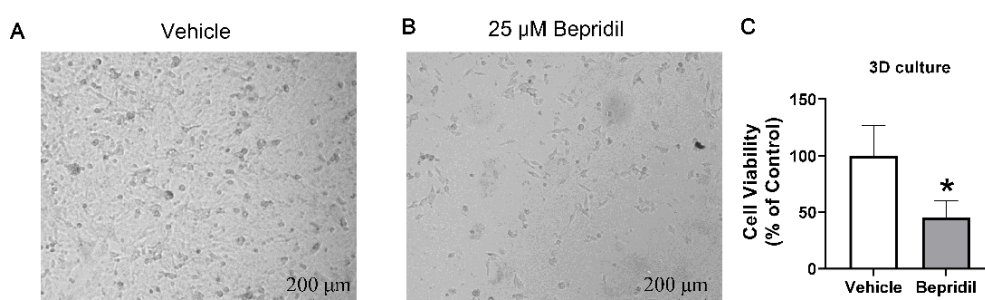

**Figure S1. 3D culture of melanoma A2058 cells and treatment with bepridil.** (A-B) A2058 cells were cultured in a hydrogel-based 3D cell culture platform and treated with vehicle (DMSO, 1/1000, v/v) or bepridil (25  $\mu$ M) for 48 hours. (C) Viability of A2058 cells were reduced by bepridil to 50% of vehicle-treated control level. \* $P < 0.05$ , bepridil treated groups vs. vehicle treatment, unpaired Student's  $t$ -test;  $n = 3$  independent experiments.

## S2. Western blotting data

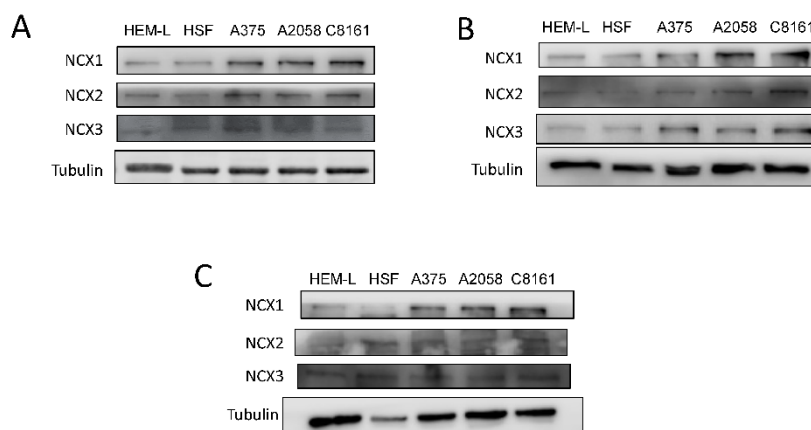

**Figure S2.** Western blotting analysis of NCX1, NCX2 and NCX3 isoforms in HEM-L, HSF, A375, A2058 and C8161 cell lines. (A-C) Three times of independent western blotting results.

## S3. Western blotting analysis and cell viability test

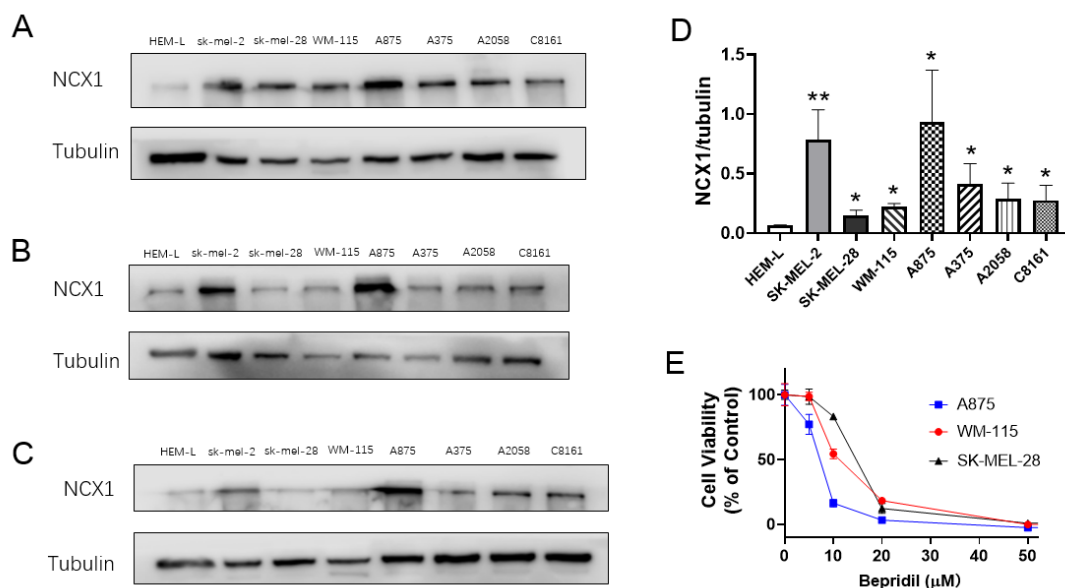

**Figure S3.** Western blotting analysis of samples from eight different cell lines. (A-C) The NCX1 isoform expressed in human epidermal melanocytes-light (HEM-L) and human melanoma cell lines SK-MEL-2, SK-MEL-28, WM-115, A875, A375, A2058 and C8161. (D) Quantification of the NCX1 obtained by western blotting. \* $P < 0.05$ , \*\* $P < 0.01$ , each cell line compared with HEM-L; one-way ANOVA followed by a Tukey's post-hoc test,  $n=3$ . (E) Viability of A875, WM-115 and SK-MEL-28 cell lines after exposed to the NCX blocker bepridil for 48 hours,  $n = 3$  independent experiments for each cell line.
